# Supplementary material
Source: PubMed Central journal article supplement (PMC8045232)
Supplement: NIHMS1053799-supplement-Supplementary_Material.pdf [file NIHMS1053799-supplement-Supplementary_Material.pdf]

I RecJ-SSBP experiments, trityl-on

S1 TTTGTGTCCAAGAATGTTTCCATCTTCTTTAAAATCAATA  
S2 CCATGATGTATACATTGTGTGAGTTATAGTTGTATTCCAA  
S3 CACCCTCTCCACTGACAGAAAATTTGTGCCATTAAACATC  
S4 ATTTTGAAGTAACTTTGATTCCATTCTTTTGTGTCTG  
S5 GTCTGCTAGTTGAACGCTTCCATCTTCAATGTTGTGTCTA  
S6 GAAGCGTTCAACTAGCAGACCATTATCAACAAAATACTCC  
S7 GGACAGGGCCATCGCCAATTGGAGTATTTTGTGATAATG  
S8 CTGTCCACACAATCTGCCCTTTCGAAAGATCCCAACGAAA  
S9 CCATGCCATGTGTAATCCCAGCAGCTGTACAAACTCAAG  
S10 TGGGATTACACATGGCATGGATGAACTATACAAAATAGGAG

II Failure strand analysis for HPLC, trityl-on / off

40b TTCTTGTTGAATTAGATGGTGATGTTAATGGGCACAAATT  
39b TCTTGTTGAATTAGATGGTGATGTTAATGGGCACAAATT  
38b CTTGTTGAATTAGATGGTGATGTTAATGGGCACAAATT  
35b GTTGAATTAGATGGTGATGTTAATGGGCACAAATT  
31b AATTAGATGGTGATGTTAATGGGCACAAATT  
20b GATGTTAATGGGCACAAATT

III Secondary structure and temperature studies, trityl-on / off

S11 ACCAGATGGCTGTTCTAGAACCGCTGACGCTGGTTCTCCAGCTGGTTCTGCTTGTGCTGA  
S12 GTAAGGCTATCCAATTGCACCCATTGGTTTGTGCTGCTTACAACGCTGACTTCGATGGTG  
S13 GTCACTACTTCTCTTATGGTGTTCAATGCTTTTCAAGATACCCAGATCATATGAAACGG  
S14 TTGGAATACAACATAACTCACACAATGTATACATCATGGCAGACAAAACAAAAGAATGGA

IV PAGE purified samples (IDT), trityl-off

40b TTCTTGTTGAATTAGATGGTGATGTTAATGGGCACAAATT  
Biotin Biotin-TTTTTTTTTTTTTTTTTTTT  
Amine Amine-TTTTTTTTTTTTTTTTTTTT  
Phosphate Phosphate-TTTTTTTTTTTTTTTTTTTT

**Table 1** Sequences for oligonucleotides used for this research (5' — 3')

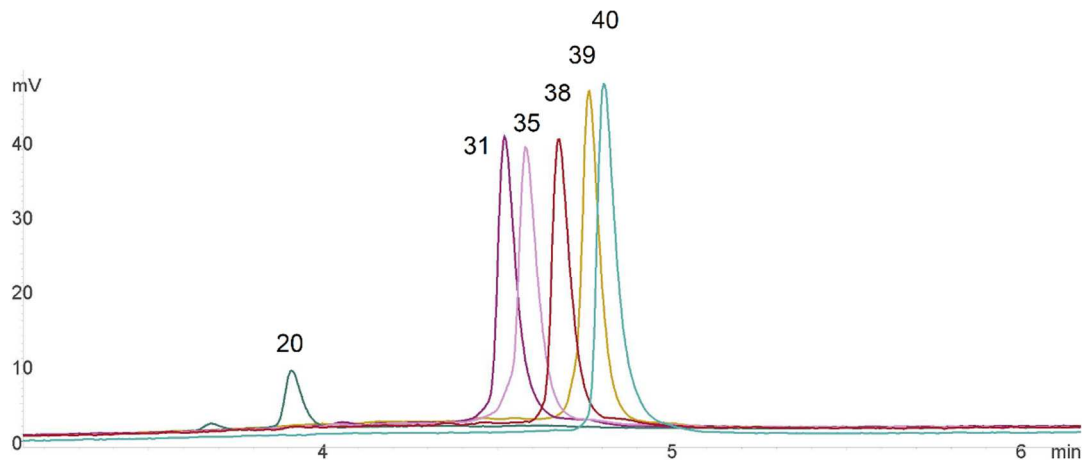

**Fig. 1** Control 5' truncated 'failure' strands processed with ion-pairing RP HPLC. This chromatogram shows oligonucleotide strand resolution between 40b - 39b, 39b - 38b, 38b - 35b, 35b - 31b and 31b - 20b, where gradient and method have been optimized for enhanced peak-resolved relative to the full-length 40b strand.

| Sample                    | 30m                 | 30m                 | 30m                    | 30m                    | 30m                      | 30m                      | 30m             | 30m             |
|---------------------------|---------------------|---------------------|------------------------|------------------------|--------------------------|--------------------------|-----------------|-----------------|
|                           | 30 U RecJ           | 30 U RecJ           | 30 U RecJ              | 30 U RecJ              | 30 U RecJ                | 30 U RecJ                | 30 U RecJ       | 30 U RecJ       |
|                           | 0.5 ug SSBP         |                     |                        |                        | 0.5 ug SSBP              |                          |                 |                 |
|                           | Total digested (pm) | Total digested (pm) | Failures digested (pm) | Failures digested (pm) | Percent failure decrease | Percent failure decrease | Increase purity | Increase purity |
| S1                        | 20.4                | 59.2                | 4                      | 12                     | 15                       | 43                       | 0.8             | 2.6             |
| S2                        | 11                  | 34.3                | 10                     | 31                     | 15                       | 47                       | 2.1             | 7.9             |
| S3                        | 17.4                | 35.7                | 13                     | 20                     | 33                       | 52                       | 3.2             | 5.1             |
| S4                        | 14                  | 30                  | 6                      | 22                     | 20                       | 81                       | 1.3             | 5.8             |
| S5                        | 18.6                | 26                  | 17                     | 24                     | 29                       | 40                       | 4.6             | 6.3             |
| S6                        | 14.1                | 40                  | 9                      | 13                     | 34                       | 45                       | 2.4             | 3.2             |
| S7                        | 7.9                 | 30.9                | 8                      | 30                     | 8                        | 28                       | 0.8             | 6               |
| S8                        | 8.1                 | 19.6                | 10                     | 20                     | 27                       | 56                       | 2               | 4.2             |
| S9                        | 8.3                 | 34                  | 9                      | 29                     | 10                       | 32                       | 1.4             | 5.7             |
| S10                       | 17.9                | 54.5                | 22                     | 44                     | 31                       | 61                       | 4.8             | 9.7             |
| <b>Average</b>            | 14                  | 36                  | 11                     | 25                     | 22                       | 49                       | 2               | 6               |
| <b>Standard deviation</b> | 5                   | 12                  | 5                      | 9                      | 10                       | 15                       | 1               | 2               |

**Table 2** Digestive performance of 30 U RecJ (+ / - 0.5 ug SSBP) on 10 unique 40b samples (crude trityl-on 500 pm) over 30 minutes incubation at 37°C.

| Sample                    | 60m                 | 60m                    | 60m                    | 60m                      | 60m                      | 60m             | 60m             | 60m       |
|---------------------------|---------------------|------------------------|------------------------|--------------------------|--------------------------|-----------------|-----------------|-----------|
|                           | 30 U RecJ           | 30 U RecJ              | 30 U RecJ              | 30 U RecJ                | 30 U RecJ                | 30 U RecJ       | 30 U RecJ       | 30 U RecJ |
|                           | 0.5 ug SSBP         |                        | 0.5 ug SSBP            |                          | 0.5 ug SSBP              |                 | 0.5 ug SSBP     |           |
| Total digested (pm)       | Total digested (pm) | Failures digested (pm) | Failures digested (pm) | Percent failure decrease | Percent failure decrease | Increase purity | Increase purity |           |
| S1                        | 35                  | 68                     | 15                     | 10                       | 55                       | 36              | 3.8             | 1.9       |
| S2                        | 27.4                | 53.9                   | 25                     | 49                       | 38                       | 73              | 6               | 13.3      |
| S3                        | 23.1                | 52.4                   | 20.8                   | 45.6                     | 30.2                     | 55.3            | 5.3             | 8         |
| S4                        | 11.4                | 39.9                   | 18.4                   | 35.3                     | 29                       | 62.1            | 3.9             | 8.5       |
| S5                        | 22.1                | 59.7                   | 15.6                   | 34.5                     | 28.3                     | 52.1            | 5               | 7.5       |
| S6                        | 28.2                | 49.3                   | 14.1                   | 27.3                     | 29.9                     | 47              | 4.7             | 7.3       |
| S7                        | 4.2                 | 48.5                   | 6                      | 47                       | 6                        | 44              | 0.1             | 10        |
| S8                        | 22.7                | 60                     | 13                     | 24                       | 37                       | 66              | 2.7             | 5         |
| S9                        | 12.7                | 38.9                   | 16                     | 38                       | 17                       | 41              | 3.1             | 7.8       |
| S10                       | 28.2                | 57.2                   | 25                     | 40                       | 35                       | 56              | 5.5             | 8.7       |
| <b>Average</b>            | 22                  | 53                     | 17                     | 35                       | 31                       | 53              | 4               | 8         |
| <b>Standard deviation</b> | 9                   | 9                      | 6                      | 12                       | 13                       | 12              | 2               | 3         |

**Table 3** Digestive performance of 30 U RecJ (+ / - 0.5 ug SSBP) on 10 unique 40b samples (crude trityl-on 500 pm) over 60 minutes incubation at 37°C.

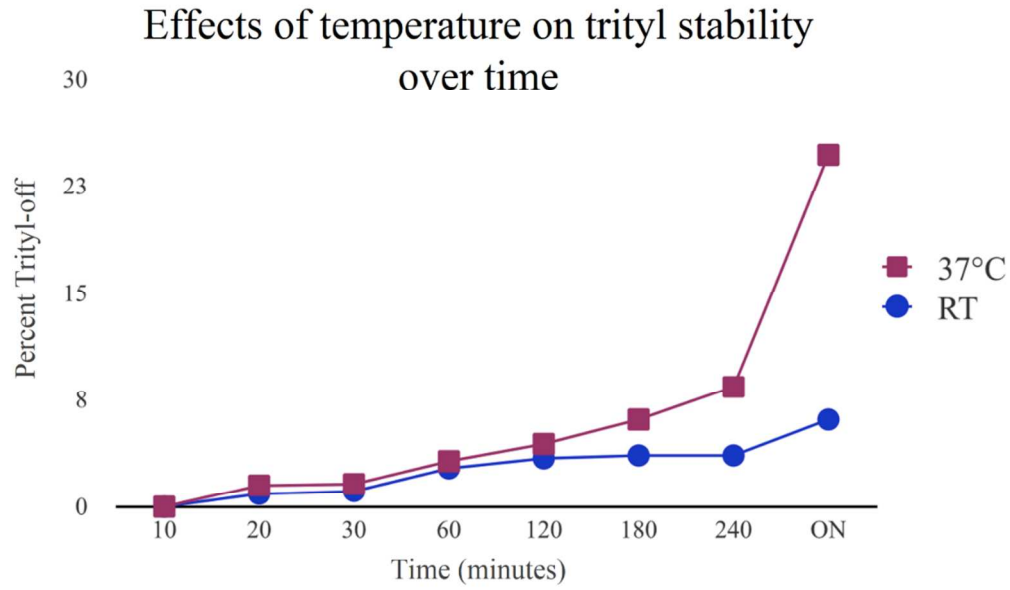

**Fig. 2** Effects of time and temperature on the rate of detritylation. Each plot point (time of sample collection) represents an average of three samples (Supplementary Table 1 III) where the percent detritylation was measured (percent peak area from RP HPLC analysis report). (RT, room temperature; ON, overnight; 5  $\mu$ M ssDNA in water and 1x Buffer 2 at pH 7).

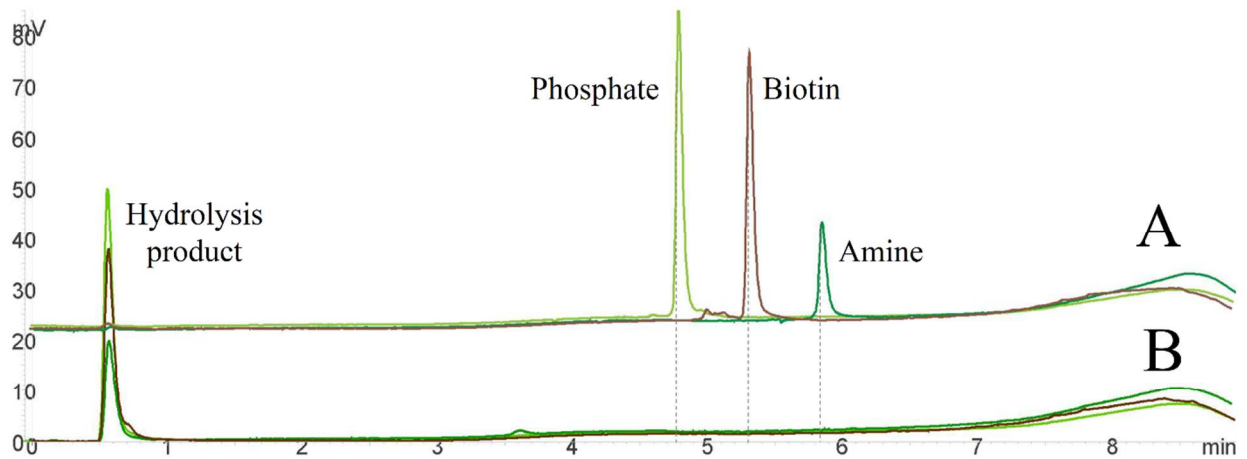

**Fig. 3** RecJ-SSBP digestion of oligonucleotides modified at the 5' end with phosphate, biotin and amine (each 20 pm). This figure shows overlapping RP HPLC chromatograms before (A) and after (B) treatment with 30 U RecJ and 0.5  $\mu$ g SSBP for 60 min at 37°C.
